# Supplementary material for: Robust performance of deep learning for distinguishing glioblastoma from single brain metastasis using radiomic features: model development and validation
Source: PubMed Central journal article supplement (PMC7374174; doi:10.1038/s41598-020-68980-6), 2020-07-21
Supplement: 41598_2020_68980_MOESM1_ESM.pdf [file 41598_2020_68980_MOESM1_ESM.pdf]

Supplementary information for:

**Robust performance of deep learning for distinguishing glioblastoma from single brain metastasis using radiomic features: Model development and validation**

Sohi Bae, M.D., Ph.D.<sup>1+</sup>, Chansik An, M.D., Ph.D.<sup>1,2+</sup>, Sung Soo Ahn, M.D., Ph.D.<sup>3\*</sup>, Hwiyoung Kim, Ph.D.<sup>3\*</sup>, Kyunghwa Han, Ph.D.<sup>3</sup>, Sang Wook Kim<sup>4</sup>, Ji Eun Park, M.D., Ph.D.<sup>5</sup>, Ho Sung Kim, M.D., Ph.D.<sup>5</sup>, Seung-Koo Lee, M.D., Ph.D.<sup>3</sup>

**Contents**

S1. Detailed diagnostic performance of different combinations of five feature-selection and seven classification methods, using CE mask

S2. Detailed diagnostic performance of different combinations of five feature-selection and seven classification methods, using PT mask

S3. Detailed diagnostic performance of different combinations of five feature-selection and seven classification methods, using combined mask

S4. Importance score of radiomics features used for seven machine learning classifiers

S5. Kappa statistics representing inter-rater agreement between various classifying methods

S6. Comparison of magnetic resonance imaging parameters of patients in the training cohort (from our institution) and those in the external validation cohort (from another tertiary medical center)

S7. Details of feature selection and classification methods

S8. Multi-input DNN implemented for deep learning

**Supplementary Table S1.** Detailed diagnostic performance of different combinations of five feature-selection and seven classification methods, using CE mask

| Classifier | Feature selection method | Optimal feature number | Optimal hyperparameters                     | Mean AUC in the training set | AUC (95% CI) in the test set |
|------------|--------------------------|------------------------|---------------------------------------------|------------------------------|------------------------------|
| kNN        | F score                  | 10                     | K = 2                                       | 0.690                        | 0.744 (0.655, 0.829)         |
|            | MI                       | 15                     | K = 11                                      | 0.742                        |                              |
|            | RFE                      | 40                     | K = 8                                       | 0.737                        |                              |
|            | Lasso                    | 37                     | K = 13                                      | 0.707                        |                              |
|            | Tree-based               | 150                    | K = 5                                       | 0.721                        |                              |
| NB         | F score                  | 130                    | NA                                          | 0.657                        | 0.618 (0.513, 0.717)         |
|            | MI                       | 20                     | NA                                          | 0.682                        |                              |
|            | RFE                      | 20                     | NA                                          | 0.676                        |                              |
|            | Lasso                    | 48                     | NA                                          | 0.675                        |                              |
|            | Tree-based               | 63                     | NA                                          | 0.665                        |                              |
| RF         | F score                  | 10                     | N_estimators = 20,<br>Min_samples leaf = 1  | 0.792                        | 0.773 (0.684, 0.857)         |
|            | MI                       | 10                     | N_estimators = 90,<br>Min_samples leaf = 5  | 0.822                        |                              |
|            | RFE                      | 40                     | N_estimators = 140,<br>Min_samples leaf = 3 | 0.839                        |                              |
|            | Lasso                    | 7                      | N_estimators = 10,<br>Min_samples leaf = 3  | 0.837                        |                              |
|            | Tree-based               | 73                     | N_estimators = 30,<br>Min_samples leaf = 1  | 0.818                        |                              |
| AdaBoost   | F score                  | 160                    | N_estimators = 25,<br>Learning_rate = 1     | 0.826                        | 0.858 (0.787, 0.926)         |
|            | MI                       | 100                    | N_estimators = 40,<br>Learning_rate = 0.01  | 0.821                        |                              |
|            | RFE                      | 80                     | N_estimators = 35,<br>Learning_rate = 0.5   | 0.860                        |                              |
|            | Lasso                    | 51                     | N_estimators = 40,<br>Learning_rate = 1.5   | 0.870                        |                              |
|            | Tree-based               | 68                     | N_estimators = 10,<br>Learning_rate = 0.05  | 0.831                        |                              |
| L-SVM      | F score                  | 25                     | C = 0.01                                    | 0.837                        | 0.833 (0.755, 0.904)         |
|            | MI                       | 160                    | C = 0.05                                    | 0.837                        |                              |
|            | RFE                      | 15                     | C = 0.15                                    | 0.873                        |                              |
|            | Lasso                    | 53                     | C = 1                                       | 0.872                        |                              |
|            | Tree-based               | 72                     | C = 0.1                                     | 0.875                        |                              |
| R-SVM      | F score                  | 65                     | C = 0.8, gamma =<br>0.0001                  | 0.844                        | 0.764 (0.674, 0.848)         |
|            | MI                       | 30                     | C = 0.08, gamma =<br>0.0001                 | 0.838                        |                              |
|            | RFE                      | 30                     | C = 0.1, gamma =<br>0.0005                  | 0.860                        |                              |
|            | Lasso                    | 51                     | C = 0.02, gamma = 0.1                       | 0.862                        |                              |
|            | Tree-based               | 30                     | C = 2, gamma = 0.05                         | 0.863                        |                              |
| LDA        | F score                  | 50                     | NA                                          | 0.723                        | 0.818 (0.737, 0.891)         |
|            | MI                       | 40                     | NA                                          | 0.792                        |                              |
|            | RFE                      | 40                     | NA                                          | 0.832                        |                              |
|            | Lasso                    | 37                     | NA                                          | 0.863                        |                              |

---

|            |    |    |       |
|------------|----|----|-------|
| Tree-based | 65 | NA | 0.813 |
|------------|----|----|-------|

---

CE = contrast-enhancing, AUC = area under the receiver operating characteristic curve, CI = confidence interval, , kNN = k-nearest neighbor, NB = naïve Bayes, RF = random forest, Ada = adaptive boosting, L-SVM = linear support vector machine, R-SVM = radial basis function support vector machine, LDA = linear discriminant analysis, MI = mutual information, RFE = recursive feature elimination, Lasso = least absolute shrinkage and selection operator

**Supplementary Table S2.** Detailed diagnostic performance of different combinations of five feature-selection and seven classification methods, using PT mask

| Classifier | Feature selection method | Optimal feature number | Optimal hyperparameters                    | Mean AUC in the training set | AUC (95% CI) in the test set |
|------------|--------------------------|------------------------|--------------------------------------------|------------------------------|------------------------------|
| kNN        | F score                  | 15                     | K = 2                                      | 0.701                        | 0.694 (0.589, 0.794)         |
|            | MI                       | 5                      | K = 8                                      | 0.699                        |                              |
|            | RFE                      | 50                     | K = 13                                     | 0.640                        |                              |
|            | Lasso                    | 6                      | K = 17                                     | 0.750                        |                              |
|            | Tree-based               | 35                     | K = 3                                      | 0.660                        |                              |
| NB         | F score                  | 5                      | NA                                         | 0.673                        | 0.753 (0.656, 0.838)         |
|            | MI                       | 15                     | NA                                         | 0.645                        |                              |
|            | RFE                      | 25                     | NA                                         | 0.638                        |                              |
|            | Lasso                    | 6                      | NA                                         | 0.660                        |                              |
|            | Tree-based               | 33                     | NA                                         | 0.658                        |                              |
| RF         | F score                  | 5                      | N_estimators = 10,<br>Min_samples leaf = 4 | 0.639                        | 0.700 (0.599, 0.798)         |
|            | MI                       | 5                      | N_estimators = 20,<br>Min_samples leaf = 4 | 0.739                        |                              |
|            | RFE                      | 5                      | N_estimators = 20,<br>Min_samples leaf = 3 | 0.628                        |                              |
|            | Lasso                    | 6                      | N_estimators = 45,<br>Min_samples leaf = 3 | 0.719                        |                              |
|            | Tree-based               | 37                     | N_estimators = 30,<br>Min_samples leaf = 2 | 0.723                        |                              |
| AdaBoost   | F score                  | 25                     | N_estimators = 10,<br>Learning_rate = 1    | 0.790                        | 0.761 (0.691, 0.827)         |
|            | MI                       | 25                     | N_estimators = 25,<br>Learning_rate = 2    | 0.746                        |                              |
|            | RFE                      | 15                     | N_estimators = 15,<br>Learning_rate = 1    | 0.722                        |                              |
|            | Lasso                    | 38                     | N_estimators = 35,<br>Learning_rate = 0.05 | 0.733                        |                              |
|            | Tree-based               | 31                     | N_estimators = 20,<br>Learning_rate = 2    | 0.816                        |                              |
| L-SVM      | F score                  | 25                     | C = 0.03                                   | 0.799                        |                              |

|       |            |    |                         |       |                      |
|-------|------------|----|-------------------------|-------|----------------------|
|       | MI         | 25 | C = 1                   | 0.714 |                      |
|       | RFE        | 20 | C = 0.008               | 0.830 | 0.803 (0.718, 0.879) |
|       | Lasso      | 25 | C = 0.2                 | 0.816 |                      |
|       | Tree-based | 34 | C = 0.8                 | 0.736 |                      |
|       | F score    | 60 | C = 2, gamma = 0.005    | 0.782 |                      |
|       | MI         | 70 | C = 2, gamma = 0.006    | 0.783 |                      |
| R-SVM | RFE        | 15 | C = 0.001, gamma = 0.02 | 0.804 |                      |
|       | Lasso      | 25 | C = 1, gamma = 0.01     | 0.817 | 0.753 (0.658, 0.839) |
|       | Tree-based | 34 | C = 0.9, gamma = 0.01   | 0.754 |                      |
|       | F score    | 50 | NA                      | 0.761 |                      |
|       | MI         | 80 | NA                      | 0.818 | 0.768 (0.673, 0.856) |
| LDA   | RFE        | 20 | NA                      | 0.763 |                      |
|       | Lasso      | 12 | NA                      | 0.798 |                      |
|       | Tree-based | 33 | NA                      | 0.794 |                      |

PT = peritumoral T2 hyperintense, AUC = area under the receiver operating characteristic curve, CI = confidence interval, , kNN = k-nearest neighbor, NB = naïve Bayes, RF = random forest, Ada = adaptive boosting, L-SVM = linear support vector machine, R-SVM = radial basis function support vector machine, LDA = linear discriminant analysis, MI = mutual information, RFE = recursive feature elimination, Lasso = least absolute shrinkage and selection operator

**Supplementary Table S3.** Detailed diagnostic performance of different combinations of five feature-selection and seven classification methods, using combined mask

| Classifier | Feature selection method | Optimal feature number | Optimal hyperparameters                    | Mean AUC in the training set | AUC (95% CI) in the test set |
|------------|--------------------------|------------------------|--------------------------------------------|------------------------------|------------------------------|
| kNN        | F score                  | 25                     | K = 7                                      | 0.719                        | 0.738 (0.648, 0.822)         |
|            | MI                       | 20                     | K = 9                                      | 0.781                        |                              |
|            | RFE                      | 20                     | K = 6                                      | 0.782                        |                              |
|            | Lasso                    | 35                     | K = 6                                      | 0.772                        |                              |
|            | Tree-based               | 97                     | K = 9                                      | 0.727                        |                              |
| NB         | F score                  | 25                     | NA                                         | 0.657                        | 0.713 (0.616, 0.804)         |
|            | MI                       | 20                     | NA                                         | 0.695                        |                              |
|            | RFE                      | 20                     | NA                                         | 0.753                        |                              |
|            | Lasso                    | 34                     | NA                                         | 0.677                        |                              |
|            | Tree-based               | 100                    | NA                                         | 0.669                        |                              |
| RF         | F score                  | 20                     | N_estimators = 15,<br>Min_samples leaf = 5 | 0.862                        | 0.780 (0.687, 0.862)         |
|            | MI                       | 120                    | N_estimators = 20,<br>Min_samples leaf = 4 | 0.853                        |                              |
|            | RFE                      | 20                     | N_estimators = 25,<br>Min_samples leaf = 2 | 0.866                        |                              |
|            | Lasso                    | 45                     | N_estimators = 45,<br>Min_samples leaf = 4 | 0.883                        |                              |
|            | Tree-based               | 96                     | N_estimators = 30,<br>Min_samples leaf = 1 | 0.857                        |                              |
| AdaBoost   | F score                  | 250                    | N_estimators = 25,<br>Learning_rate = 2    | 0.918                        | 0.890 (0.823, 0.947)         |
|            | MI                       | 65                     | N_estimators = 20<br>Learning_rate = 2     | 0.910                        |                              |
|            | RFE                      | 60                     | N_estimators = 20,<br>Learning_rate = 0.5  | 0.910                        |                              |
|            | Lasso                    | 44                     | N_estimators = 35,<br>Learning_rate = 0.1  | 0.899                        |                              |
|            | Tree-based               | 96                     | N_estimators = 20,<br>Learning_rate = 1    | 0.926                        |                              |
| L-SVM      | F score                  | 120                    | C = 0.1                                    | 0.929                        |                              |

|       |            |     |                        |       |                      |
|-------|------------|-----|------------------------|-------|----------------------|
|       | MI         | 130 | C = 0.4                | 0.899 |                      |
|       | RFE        | 70  | C = 0.05               | 0.932 | 0.886 (0.822, 0.940) |
|       | Lasso      | 34  | C = 1.2                | 0.928 |                      |
|       | Tree-based | 110 | C = 1                  | 0.901 |                      |
|       | F score    | 45  | C = 2, gamma = 0.005   | 0.908 |                      |
|       | MI         | 20  | C = 0.05, gamma = 0.04 | 0.900 |                      |
| R-SVM | RFE        | 30  | C = 3, gamma = 0.02    | 0.925 | 0.827 (0.749, 0.898) |
|       | Lasso      | 8   | C = 1, gamma = 0.06    | 0.883 |                      |
|       | Tree-based | 250 | C = 2, gamma = 0.002   | 0.883 |                      |
|       | F score    | 55  | NA                     | 0.860 |                      |
|       | MI         | 40  | NA                     | 0.830 |                      |
| LDA   | RFE        | 40  | NA                     | 0.941 |                      |
|       | Lasso      | 34  | NA                     | 0.945 | 0.883 (0.816, 0.941) |
|       | Tree-based | 98  | NA                     | 0.760 |                      |

AUC = area under the receiver operating characteristic curve, CI = confidence interval, , kNN = k-nearest neighbor, NB = naïve Bayes, RF = random forest, Ada = adaptive boosting, L-SVM = linear support vector machine, R-SVM = radial basis function support vector machine, LDA = linear discriminant analysis, MI = mutual information, RFE = recursive feature elimination, Lasso = least absolute shrinkage and selection operator

**Supplementary Table S4.** Importance score of radiomics features used for seven machine learning classifiers

| Features                                                 | kNN  | NB   | RF   | AdaBoost | L-SVM | R-SVM | LDA  | Total |
|----------------------------------------------------------|------|------|------|----------|-------|-------|------|-------|
| CE_mask_with_T2_image_firstorder_Median                  | 1.00 | 0.42 | 0.32 | 0.16     | 1.00  | 1.00  | 0.46 | 4.35  |
| CE_mask_with_T2_image_firstorder_10Percentile            | NS   | 0.54 | 1.00 | 0.87     | 0.55  | 0.40  | 0.08 | 3.44  |
| periT2_mask_with_T2_image_shape_Maximum2DDiameterRow     | 0.74 | NS   | NS   | 0.79     | 0.43  | 0.08  | 0.09 | 2.13  |
| periT2_mask_with_T2_image_firstorder_Median              | 0.60 | NS   | NS   | 0.61     | 0.66  | NS    | NS   | 1.86  |
| periT2_mask_with_T2_image_shape_Flatness                 | NS   | NS   | NS   | 0.61     | 0.34  | 0.76  | 0.05 | 1.76  |
| periT2_mask_with_T2_image_glszm_GrayLevelNonUniformity   | NS   | NS   | NS   | 0.34     | 0.22  | 0.84  | 0.16 | 1.56  |
| periT2_mask_with_T2_image_glszm_SizeZoneNonUniformity    | 0.67 | 0.08 | NS   | 0.34     | 0.07  | 0.24  | 0.00 | 1.40  |
| CE_mask_with_T2_image_firstorder_InterquartileRange      | 0.77 | 0.38 | NS   | 0.00     | 0.01  | 0.08  | 0.11 | 1.35  |
| CE_mask_with_CE_image_glcm_Id                            | NS   | NS   | NS   | 0.32     | 0.01  | NS    | 1.00 | 1.33  |
| CE_mask_with_CE_image_glrml_LowGrayLevelRunEmphasis      | NS   | NS   | NS   | 0.00     | 0.45  | 0.20  | 0.63 | 1.28  |
| CE_mask_with_T2_image_glszm_GrayLevelNonUniformity       | NS   | 0.04 | 0.18 | 1.00     | NS    | NS    | NS   | 1.22  |
| CE_mask_with_T2_image_firstorder_Skewness                | NS   | 0.04 | 0.59 | 0.47     | NS    | NS    | NS   | 1.11  |
| CE_mask_with_CE_image_firstorder_10Percentile            | 0.60 | NS   | 0.27 | 0.00     | 0.00  | 0.16  | NS   | 1.03  |
| CE_mask_with_T2_image_firstorder_MeanAbsoluteDeviation   | NS   | 1.00 | NS   | NS       | NS    | NS    | NS   | 1.00  |
| CE_mask_with_CE_image_glcm_InverseVariance               | NS   | NS   | NS   | 0.00     | 0.37  | 0.04  | 0.58 | 0.98  |
| CE_mask_with_CE_image_glcm_Autocorrelation               | NS   | NS   | NS   | 0.00     | 0.00  | NS    | 0.94 | 0.94  |
| CE_mask_with_T2_image_firstorder_Mean                    | 0.11 | NS   | 0.14 | 0.00     | 0.03  | 0.44  | 0.20 | 0.91  |
| CE_mask_with_CE_image_firstorder_Median                  | NS   | NS   | 0.82 | 0.00     | 0.07  | NS    | NS   | 0.88  |
| CE_mask_with_T2_image_glcm_DifferenceAverage             | NS   | NS   | 0.82 | NS       | NS    | NS    | NS   | 0.82  |
| CE_mask_with_CE_image_glrml_ShortRunLowGrayLevelEmphasis | NS   | NS   | NS   | 0.50     | 0.00  | 0.08  | 0.23 | 0.81  |
| periT2_mask_with_T2_image_glrml_RunVariance              | NS   | NS   | 0.77 | NS       | 0.03  | NS    | NS   | 0.80  |
| periT2_mask_with_T2_image_glrml_LowGrayLevelRunEmphasis  | NS   | NS   | 0.77 | NS       | 0.00  | NS    | NS   | 0.77  |
| CE_mask_with_CE_image_glrml_LongRunLowGrayLevelEmphasis  | NS   | NS   | 0.41 | 0.00     | 0.04  | 0.32  | NS   | 0.77  |
| periT2_mask_with_T2_image_firstorder_Skewness            | NS   | 0.08 | NS   | 0.68     | 0.00  | NS    | NS   | 0.77  |
| CE_mask_with_CE_image_glszm_LowGrayLevelZoneEmphasis     | NS   | NS   | 0.45 | 0.00     | 0.03  | 0.16  | 0.07 | 0.71  |
| CE_mask_with_CE_image_glcm_D                             | NS   | NS   | NS   | 0.00     | NS    | NS    | 0.71 | 0.71  |



|                                                              |      |      |      |      |      |      |      |      |
|--------------------------------------------------------------|------|------|------|------|------|------|------|------|
| ifferenceAverage                                             |      |      |      |      |      |      |      |      |
| CE_mask_with_T2_image_glcm_DifferenceEntropy                 | NS   | NS   | NS   | 0.45 | 0.04 | NS   | 0.20 | 0.69 |
| CE_mask_with_CE_image_shape_LeastAxisLength                  | 0.18 | 0.13 | 0.36 | 0.00 | NS   | NS   | NS   | 0.66 |
| CE_mask_with_CE_image_firstorder_Mean                        | NS   | NS   | NS   | 0.50 | 0.00 | 0.16 | NS   | 0.66 |
| periT2_mask_with_T2_image_glrmlm_ShortRunEmphasis            | NS   | NS   | NS   | 0.58 | NS   | 0.08 | NS   | 0.66 |
| periT2_mask_with_T2_image_firstorder_Minimum                 | 0.33 | 0.00 | 0.32 | 0.00 | NS   | NS   | NS   | 0.65 |
| CE_mask_with_CE_image_glrmlm_RunLengthNonUniformity          | NS   | NS   | NS   | NS   | 0.29 | 0.32 | NS   | 0.61 |
| CE_mask_with_CE_image_shape_Flatness                         | NS   | NS   | NS   | 0.58 | NS   | NS   | NS   | 0.58 |
| CE_mask_with_CE_image_shape_Maximum2DDiameterRow             | 0.12 | 0.17 | NS   | 0.16 | 0.08 | 0.04 | NS   | 0.57 |
| CE_mask_with_CE_image_glszm_GrayLevelVariance                | NS   | NS   | NS   | 0.45 | 0.11 | NS   | NS   | 0.55 |
| CE_mask_with_T2_image_firstorder_RobustMeanAbsoluteDeviation | NS   | NS   | 0.55 | 0.00 | 0.00 | NS   | NS   | 0.55 |
| CE_mask_with_CE_image_glcm_SumAverage                        | NS   | NS   | NS   | 0.00 | NS   | 0.08 | 0.46 | 0.54 |
| CE_mask_with_CE_image_glcm_JointAverage                      | NS   | NS   | NS   | 0.00 | 0.07 | NS   | 0.46 | 0.53 |
| CE_mask_with_T2_image_firstorder_Minimum                     | 0.53 | NS   | NS   | NS   | NS   | NS   | NS   | 0.53 |
| CE_mask_with_T2_image_glcm_JointEnergy                       | NS   | NS   | 0.36 | 0.00 | 0.08 | 0.08 | NS   | 0.52 |
| CE_mask_with_T2_image_firstorder_RootMeanSquared             | NS   | NS   | NS   | NS   | NS   | 0.48 | NS   | 0.48 |
| CE_mask_with_CE_image_glszm_SmallAreaHighGrayLevelEmphasis   | NS   | NS   | 0.45 | NS   | NS   | NS   | NS   | 0.45 |
| CE_mask_with_T2_image_glcm_MaximumProbability                | NS   | NS   | 0.18 | 0.00 | 0.11 | 0.08 | 0.07 | 0.44 |
| CE_mask_with_CE_image_firstorder_InterquartileRange          | NS   | NS   | NS   | NS   | 0.14 | 0.28 | NS   | 0.42 |
| periT2_mask_with_T2_image_glrmlm_RunEntropy                  | NS   | NS   | 0.32 | 0.00 | 0.11 | NS   | NS   | 0.42 |
| CE_mask_with_CE_image_firstorder_Minimum                     | 0.37 | 0.00 | 0.05 | NS   | NS   | NS   | NS   | 0.41 |
| periT2_mask_with_T2_image_shape_LeastAxisLength              | 0.40 | 0.00 | NS   | NS   | NS   | NS   | NS   | 0.40 |
| CE_mask_with_T2_image_ngtdm_Strength                         | NS   | 0.17 | 0.23 | NS   | NS   | NS   | NS   | 0.39 |
| periT2_mask_with_T2_image_glcm_JointAverage                  | NS   | NS   | 0.36 | 0.00 | 0.00 | NS   | 0.02 | 0.39 |
| CE_mask_with_CE_image_firstorder_90Percentile                | 0.37 | NS   | NS   | 0.00 | 0.00 | NS   | NS   | 0.37 |
| CE_mask_with_T2_image_glrmlm_LongRunEmphasis                 | NS   | NS   | 0.36 | NS   | NS   | NS   | NS   | 0.36 |
| CE_mask_with_T2_image_glcm_SumEntropy                        | NS   | NS   | 0.36 | NS   | NS   | NS   | NS   | 0.36 |
| CE_mask_with_CE_image_glrmlm_ShortRunHighGrayLevelEmphasis   | NS   | NS   | 0.05 | 0.32 | NS   | NS   | NS   | 0.36 |
| CE_mask_with_CE_image_glcm_JointEnergy                       | NS   | NS   | NS   | 0.00 | NS   | 0.36 | NS   | 0.36 |

|                                                              |      |      |      |      |      |      |      |      |
|--------------------------------------------------------------|------|------|------|------|------|------|------|------|
| CE_mask_with_T2_image_grlm_LongRunLowGrayLevelEmphasis       | NS   | NS   | 0.32 | NS   | NS   | NS   | NS   | 0.32 |
| CE_mask_with_CE_image_glszm_HighGrayLevelZoneEmphasis        | NS   | NS   | 0.32 | NS   | NS   | NS   | NS   | 0.32 |
| CE_mask_with_T2_image_shape_LeastAxisLength                  | 0.18 | 0.13 | 0.00 | NS   | NS   | NS   | NS   | 0.30 |
| CE_mask_with_T2_image_firstorder_Entropy                     | NS   | NS   | 0.27 | NS   | 0.03 | NS   | NS   | 0.30 |
| periT2_mask_with_T2_image_grlm_RunLengthNonUniformity        | NS   | NS   | NS   | 0.00 | 0.00 | 0.28 | NS   | 0.28 |
| CE_mask_with_CE_image_firstorder_RobustMeanAbsoluteDeviation | NS   | NS   | NS   | NS   | NS   | 0.28 | NS   | 0.28 |
| CE_mask_with_T2_image_shape_Maximum2DDiameterRow             | 0.12 | NS   | NS   | NS   | 0.08 | NS   | 0.07 | 0.27 |
| periT2_mask_with_T2_image_glszm_GrayLevelVariance            | NS   | NS   | NS   | 0.00 | 0.25 | NS   | NS   | 0.25 |
| CE_mask_with_T2_image_glszm_LowGrayLevelZoneEmphasis         | NS   | NS   | 0.23 | NS   | NS   | NS   | NS   | 0.23 |
| periT2_mask_with_T2_image_glcm_Correlation                   | NS   | NS   | 0.23 | NS   | NS   | NS   | NS   | 0.23 |
| CE_mask_with_T2_image_glcm_JointAverage                      | NS   | NS   | 0.23 | 0.00 | NS   | NS   | NS   | 0.23 |
| CE_mask_with_T2_image_glcm_JointEntropy                      | NS   | NS   | 0.23 | 0.00 | 0.00 | NS   | NS   | 0.23 |
| CE_mask_with_CE_image_ngtdm_Complexity                       | NS   | NS   | 0.23 | 0.00 | NS   | NS   | NS   | 0.23 |
| CE_mask_with_CE_image_grlm_RunVariance                       | NS   | NS   | 0.23 | NS   | NS   | NS   | NS   | 0.23 |
| CE_mask_with_CE_image_glcm_ClusterTendency                   | NS   | NS   | 0.23 | NS   | NS   | NS   | NS   | 0.23 |
| periT2_mask_with_T2_image_ngtdm_Complexity                   | 0.21 | NS   | NS   | NS   | NS   | NS   | NS   | 0.21 |
| CE_mask_with_T2_image_shape_Maximum2DDiameterSlice           | NS   | NS   | NS   | NS   | NS   | NS   | 0.21 | 0.21 |
| CE_mask_with_T2_image_glcm_ClusterShade                      | NS   | NS   | NS   | 0.00 | 0.05 | NS   | 0.13 | 0.19 |
| CE_mask_with_CE_image_glcm_Contrast                          | NS   | NS   | 0.18 | NS   | NS   | NS   | NS   | 0.18 |
| CE_mask_with_CE_image_grlm_RunPercentage                     | NS   | NS   | 0.18 | NS   | NS   | NS   | NS   | 0.18 |
| CE_mask_with_T2_image_grlm_RunEntropy                        | NS   | NS   | 0.18 | NS   | NS   | NS   | NS   | 0.18 |
| CE_mask_with_T2_image_firstorder_Uniformity                  | NS   | NS   | 0.18 | 0.00 | NS   | NS   | NS   | 0.18 |
| CE_mask_with_CE_image_glcm_JointEntropy                      | NS   | NS   | 0.18 | NS   | NS   | NS   | NS   | 0.18 |
| CE_mask_with_CE_image_firstorder_Entropy                     | NS   | NS   | 0.18 | NS   | NS   | NS   | NS   | 0.18 |
| CE_mask_with_CE_image_glcm_MaximumProbability                | NS   | NS   | 0.18 | NS   | NS   | NS   | NS   | 0.18 |
| CE_mask_with_CE_image_firstorder_MeanAbsoluteDeviation       | NS   | NS   | 0.18 | NS   | NS   | NS   | NS   | 0.18 |
| CE_mask_with_CE_image_grlm_RunLengthNonUniformityNormalized  | NS   | NS   | NS   | 0.00 | 0.17 | NS   | NS   | 0.17 |
| CE_mask_with_T2_image_firstorder_Kurtosis                    | NS   | 0.17 | NS   | NS   | NS   | NS   | NS   | 0.17 |

|                                                                  |      |      |      |      |      |      |      |      |
|------------------------------------------------------------------|------|------|------|------|------|------|------|------|
| CE_mask_with_CE_image_glcm_SumEntropy                            | NS   | NS   | NS   | 0.00 | 0.16 | NS   | 0.01 | 0.16 |
| CE_mask_with_T2_image_glcm_InverseVariance                       | NS   | NS   | NS   | NS   | 0.00 | 0.16 | NS   | 0.16 |
| CE_mask_with_T2_image_firstorder_Range                           | NS   | NS   | NS   | NS   | 0.13 | NS   | NS   | 0.13 |
| CE_mask_with_CE_image_glrml_HighGrayLevelRunEmphasis             | NS   | NS   | NS   | 0.00 | 0.00 | NS   | 0.13 | 0.13 |
| CE_mask_with_T2_image_glszm_HighGrayLevelZoneEmphasis            | NS   | NS   | NS   | 0.00 | NS   | NS   | 0.13 | 0.13 |
| CE_mask_with_CE_image_shape_MinorAxisLength                      | NS   | 0.13 | NS   | NS   | NS   | NS   | NS   | 0.13 |
| CE_mask_with_T2_image_glszm_SizeZoneNonUniformity                | 0.12 | NS   | NS   | NS   | NS   | NS   | NS   | 0.12 |
| periT2_mask_with_T2_image_shape_Maximum3DDiameter                | NS   | NS   | NS   | 0.00 | 0.08 | 0.04 | NS   | 0.12 |
| CE_mask_with_CE_image_firstorder_Maximum                         | NS   | NS   | NS   | 0.00 | 0.12 | NS   | NS   | 0.12 |
| periT2_mask_with_T2_image_firstorder_MeanAbsoluteDeviation       | 0.11 | 0.00 | NS   | NS   | NS   | NS   | NS   | 0.11 |
| periT2_mask_with_T2_image_glszm_GrayLevelNonUniformityNormalized | NS   | NS   | NS   | 0.00 | 0.09 | NS   | NS   | 0.09 |
| CE_mask_with_T2_image_glrml_ShortRunEmphasis                     | NS   | NS   | 0.09 | NS   | NS   | NS   | NS   | 0.09 |
| periT2_mask_with_T2_image_shape_VoxelVolume                      | NS   | NS   | NS   | 0.00 | 0.05 | 0.00 | 0.04 | 0.09 |
| CE_mask_with_T2_image_glcm_Id                                    | NS   | NS   | NS   | 0.00 | NS   | NS   | 0.09 | 0.09 |
| periT2_mask_with_T2_image_ngtdm_Strength                         | 0.00 | 0.08 | NS   | 0.00 | NS   | NS   | NS   | 0.08 |
| CE_mask_with_T2_image_firstorder_Energy                          | NS   | NS   | NS   | NS   | 0.00 | NS   | 0.07 | 0.07 |
| periT2_mask_with_T2_image_shape_MeshVolume                       | NS   | NS   | NS   | 0.00 | 0.07 | 0.00 | NS   | 0.07 |
| CE_mask_with_T2_image_glszm_SizeZoneNonUniformityNormalized      | NS   | NS   | NS   | 0.00 | 0.07 | NS   | NS   | 0.07 |
| CE_mask_with_CE_image_glcm_DifferenceEntropy                     | NS   | NS   | NS   | 0.00 | 0.00 | NS   | 0.05 | 0.05 |
| CE_mask_with_T2_image_glcm_SumSquares                            | NS   | NS   | NS   | NS   | 0.04 | NS   | NS   | 0.04 |
| CE_mask_with_CE_image_firstorder_RootMeanSquared                 | NS   | NS   | NS   | 0.00 | 0.03 | NS   | 0.01 | 0.03 |
| CE_mask_with_CE_image_shape_SurfaceVolumeRatio                   | NS   | NS   | NS   | 0.00 | 0.00 | NS   | 0.03 | 0.03 |
| CE_mask_with_T2_image_shape_SurfaceVolumeRatio                   | NS   | NS   | NS   | 0.00 | NS   | NS   | 0.03 | 0.03 |
| CE_mask_with_CE_image_firstorder_Skewness                        | NS   | NS   | NS   | 0.00 | 0.03 | NS   | NS   | 0.03 |
| periT2_mask_with_T2_image_glszm_ZoneEntropy                      | NS   | NS   | NS   | NS   | 0.03 | NS   | NS   | 0.03 |
| periT2_mask_with_T2_image_glcm_SumAverage                        | NS   | NS   | NS   | 0.00 | 0.00 | NS   | 0.02 | 0.02 |
| CE_mask_with_T2_image_shape_Elongation                           | NS   | NS   | NS   | NS   | 0.01 | NS   | NS   | 0.01 |
| CE_mask_with_T2_image_glcm_Idm                                   | NS   | NS   | NS   | 0.00 | 0.01 | NS   | NS   | 0.01 |
| periT2_mask_with_T2_image_glrml                                  | NS   | NS   | NS   | 0.00 | 0.01 | NS   | NS   | 0.01 |

|                                                       |    |    |    |    |      |    |    |      |
|-------------------------------------------------------|----|----|----|----|------|----|----|------|
| m_GrayLevelNonUniformity                              |    |    |    |    |      |    |    |      |
| periT2_mask_with_T2_image_firsto<br>rder_90Percentile | NS | NS | NS | NS | 0.01 | NS | NS | 0.01 |

Features with zero total score were not included.

kNN = k-nearest neighbor, NB = naïve Bayes, RF = random forest, ADA = adaptive boosting, L-SVM = linear support vector machine, R-SVM = radial basis function support vector machine, LDA = linear discriminant analysis, CE = contrast-enhancing, NS = not selected for this classifier.

**Supplementary Table S5.** Kappa statistics representing inter-rater agreement between various classifying methods

|                 | <b>AdaBoost</b> | <b>L-SVM</b> | <b>LDA</b> | <b>DNN</b> | <b>Human 1</b> | <b>Human 2</b> |
|-----------------|-----------------|--------------|------------|------------|----------------|----------------|
| <b>AdaBoost</b> | 1.0             | 0.607        | 0.644      | 0.742      | 0.17           | 0.421          |
| <b>L-SVM</b>    | 0.607           | 1.0          | 0.631      | 0.685      | 0.238          | 0.466          |
| <b>LDA</b>      | 0.644           | 0.631        | 1.0        | 0.663      | 0.285          | 0.546          |
| <b>DNN</b>      | 0.742           | 0.685        | 0.663      | 1.0        | 0.311          | 0.479          |
| <b>Human 1</b>  | 0.17            | 0.238        | 0.285      | 0.311      | 1.0            | 0.505          |
| <b>Human 2</b>  | 0.421           | 0.466        | 0.546      | 0.479      | 0.505          | 1.0            |

AdaBoost = adaptive boosting, L-SVM = linear support vector machine, R-SVM = radial basis function support vector machine, LDA = linear discriminant analysis.

**Supplementary Table S6.** Comparison of magnetic resonance imaging parameters of patients in the training cohort (from our institution) and those in the external validation cohort (from another tertiary medical center).

| Pulse Sequence                      | Our institution        | External validation set |
|-------------------------------------|------------------------|-------------------------|
| T2-weighted image                   |                        |                         |
| Repetition Time (ms)                | 3000–9000              | 3000                    |
| Echo Time (ms)                      | 80–120                 | 80–120                  |
| Matrix                              | 256 × 256              | 256 × 256               |
| Section thickness (mm)              | 5                      | 4–7                     |
| Field of view                       | 220–240                | 230–240                 |
| Contrast-enhanced T1-weighted image |                        |                         |
| Repetition Time (ms)                | 6.3–8.3                | 6.4–10.1                |
| Echo Time (ms)                      | 2.9–4                  | 2.8–4.8                 |
| Matrix                              | 256 × 256 or 192 × 192 | 512 × 512               |
| Section thickness (mm)              | 1                      | 0.5                     |
| Field of view                       | 224–240                | 224–230                 |

**Supplementary Table S7. Details of feature selection and classification method**

|   | <b>Acronym</b> | <b>Feature selection method</b>                 |
|---|----------------|-------------------------------------------------|
| 1 | F score        | F score                                         |
| 2 | MI             | Mutual information                              |
| 3 | RFE            | Recursive feature elimination                   |
| 4 | LASSO          | Least absolute shrinkage and selection operator |
| 5 | Tree-based     | Tree-based                                      |

  

|   | <b>Acronym</b> | <b>Classification method</b>                              |
|---|----------------|-----------------------------------------------------------|
| 1 | kNN            | k-nearest neighbor                                        |
| 2 | NB             | Naïve Bayes                                               |
| 3 | RF             | Random forest                                             |
| 4 | AdaBoost       | Adaptive boosting                                         |
| 5 | L-SVM          | Support vector machine using linear kernel                |
| 6 | R-SVM          | Support vector machine using radial basis function kernel |
| 7 | LDA            | Linear discriminant analysis                              |

## **Feature selection methods**

### **1. F score<sup>1</sup>**

The F score is a univariate feature selection method. It is based on F-test estimate the degree of linear dependency between two random variables. It is to find a subset of features, such that in the data space spanned by the selected features, the distances between data points in different classes are as large as possible, while the distances between data points in the same class are as small as possible.

### **2. MI (Mutual information)<sup>2</sup>**

The MI method measures arbitrary dependencies between random variables. It is suitable for assessing the information content of features in complex classification tasks, where methods based on linear relations are prone to mistakes

### **3. RFE (Recursive feature elimination)<sup>3</sup>**

The RFE selects features by recursively considering smaller and smaller sets of features. The estimator is trained on an initial set of features and weights are assigned to each. Then the features whose absolute weights are the smallest are eliminated from the current features in a backwards elimination manner. This procedure is recursively repeated until the desired number of features is reached

### **4. LASSO (Least absolute shrinkage and selection operator)<sup>4</sup>**

The LASSO performs two tasks: regularization and feature selection. The LASSO minimizes the residual sum of squares subject to the sum of the absolute value of the coefficients being less than a constant. Because of the nature of this constraint it tends to produce some coefficients that are exactly 0 and hence gives interpretable models.



## **5. Tree-based<sup>5</sup>**

The tree-based algorithm utilizes a tree structure to model relationships among the features and the potential outcomes. A standard CART algorithm is used to select the split predictor that maximizes the split-criterion gain over all possible splits of all predictors. Finding the optimal size of the tree helps improve predictive accuracy through the reduction of overfitting.

### **Classification methods**

#### **1. kNN (k-nearest neighbor)<sup>6</sup>**

The kNN algorithm assigns to unclassified observation (incoming test sample) the class/category/label of the nearest sample (using metric) in training set. The letter k is a variable term implying that any number of nearest neighbors could be used.

#### **2. NB (Naïve Bayes)<sup>7</sup>**

The NB model assumes that observations have a multivariate distribution, given class membership, but the predictor and features composing the observation are independent.

#### **3. RF (Random forest)<sup>8</sup>**

The RF model uses ensembles of trees, where each tree in the ensemble is grown in accordance with a random parameter. Final predictions are obtained by aggregating over the ensemble. As the base constituents of the ensemble are tree-structured predictors, and since each of these trees is constructed using an injection of randomness.

#### **4. AdaBoost (Adaptive boosting)<sup>9</sup>**

The ADA is a general method for generating a strong classifier out of a set of weak classifiers. It works even when the classifiers come from a continuum of potential classifiers (such as neural networks, linear discriminants, etc.).

#### **5. L-SVM (Support vector machine using linear kernel)<sup>10</sup>**

The L-SVM model constructs a hyperplane separating data into two classes. The optimal hyperplane maximizes a margin surrounding itself, which creates boundaries for positive and negative classes.

#### **6. R-SVM (Support vector machine using radial basis function kernel)<sup>10</sup>**

The R-SVM is a nonlinear version of L-SVM with Gaussian kernel function that projects original features onto a higher dimensional space via a nonlinear mapping function where it becomes linearly separable.

#### **7. LDA (Linear discriminant analysis)<sup>11</sup>**

The LDA model searches for the vectors in the underlying space that best discriminate among classes (rather than those that best describe the data). Given a number of independent features relative to which the data is described, LDA creates a linear combination of these which yields the largest mean differences between the desired classes. The goal is to maximize the between-class measure while minimizing the within-class measure.

**Supplementary Figure S8.** Multi-input DNN implemented for deep learning

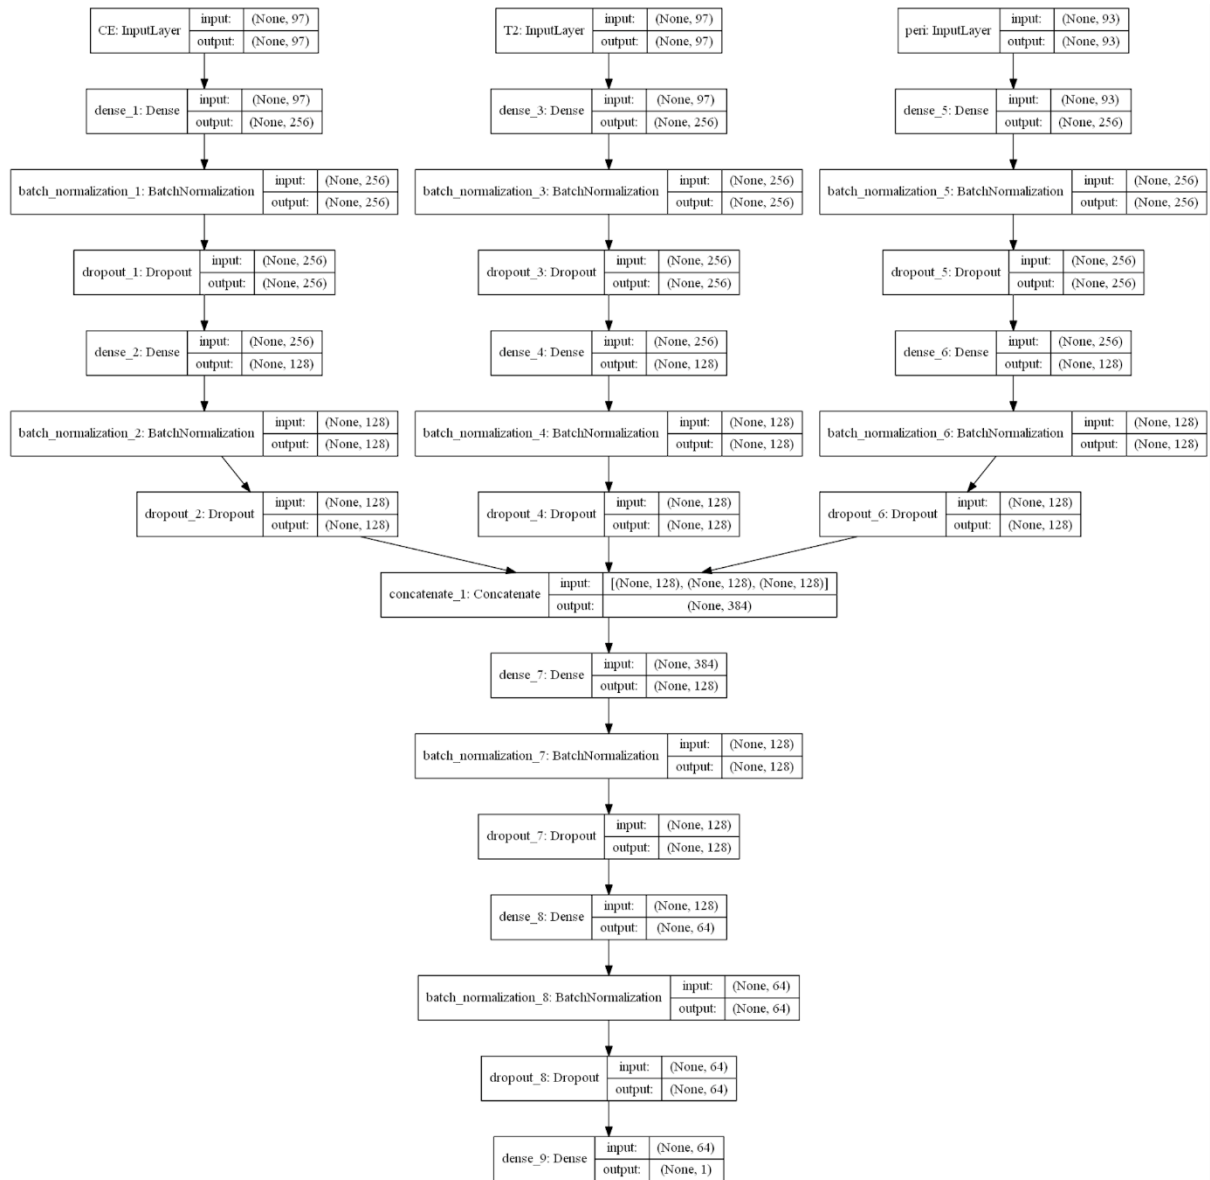

## References

- 1 Gu, Q., Li, Z. & Han, J. Generalized fisher score for feature selection. *arXiv preprint arXiv:1202.3725* (2012).
- 2 Battiti, R. Using mutual information for selecting features in supervised neural net learning. *IEEE Transactions on neural networks* **5**, 537-550 (1994).
- 3 Guyon, I., Weston, J., Barnhill, S. & Vapnik, V. Gene selection for cancer classification using support vector machines. *Machine learning* **46**, 389-422 (2002).
- 4 Tibshirani, R. Regression shrinkage and selection via the lasso. *Journal of the Royal Statistical Society: Series B (Methodological)* **58**, 267-288 (1996).
- 5 Loh, W. Y. Classification and regression trees. *Wiley Interdisciplinary Reviews: Data Mining and Knowledge Discovery* **1**, 14-23 (2011).
- 6 Cover, T. & Hart, P. Nearest neighbor pattern classification. *IEEE transactions on information theory* **13**, 21-27 (1967).
- 7 Friedman, J., Hastie, T. & Tibshirani, R. *The elements of statistical learning*. Vol. 1 (Springer series in statistics New York, 2001).
- 8 Biau, G. Analysis of a random forests model. *Journal of Machine Learning Research* **13**, 1063-1095 (2012).
- 9 Rojas, R. AdaBoost and the super bowl of classifiers a tutorial introduction to adaptive boosting. *Freie University, Berlin, Tech. Rep* (2009).
- 10 Cristianini, N. & Shawe-Taylor, J. *An introduction to support vector machines and other kernel-based learning methods*. (Cambridge university press, 2000).
- 11 Martínez, A. M. & Kak, A. C. Pca versus lda. *IEEE transactions on pattern analysis and machine intelligence* **23**, 228-233 (2001).
